# Supplementary material for: Artificial intelligence for radiographic imaging detection of caries lesions: a systematic review
Source: PubMed Central journal article supplement (PMC10894487; doi:10.1186/s12903-024-04046-7), 2024-02-24
Supplement: 12903_2024_4046_MOESM2_ESM.pdf [file 12903_2024_4046_MOESM2_ESM.pdf]

## Additional file 2. QUADAS-2

| Study                  | RISK OF BIAS       |            |                    |             | APPLICABILITY CONCERNS |            |                    |
|------------------------|--------------------|------------|--------------------|-------------|------------------------|------------|--------------------|
|                        | PATIENTS SELECTION | INDEX TEST | REFERENCE STANDARD | FLOW TIMING | PATIENTS SELECTION     | INDEX TEST | REFERENCE STANDARD |
| Devito et al.          | Unclear            | Low risk   | Low Risk           | Low risk    | High risk              | Low risk   | High risk          |
| Lee et al.             | Low risk           | Low risk   | Low risk           | Unclear     | Low risk               | Low risk   | Low risk           |
| Choi et al.            | Low risk           | Unclear    | High risk          | High risk   | Low risk               | Unclear    | High risk          |
| Cantu et al.           | Low risk           | Low risk   | High risk          | Low risk    | Low risk               | High risk  | Unclear            |
| Geetha et al.          | High risk          | Low risk   | Unclear            | Low risk    | Low risk               | Low risk   | Low risk           |
| Chen et al.            | Low risk           | Low risk   | Low risk           | Unclear     | Low risk               | High risk  | Low risk           |
| Devlin et al.          | Low risk           | Low risk   | Low risk           | Low risk    | Low risk               | Low risk   | Low risk           |
| Bayrakdar et al.       | Low risk           | Low risk   | Low risk           | Low risk    | Low risk               | Low risk   | Low risk           |
| Lian et al.            | Low risk           | Low risk   | High risk          | Unclear     | Low risk               | Low risk   | Low risk           |
| Moran et al.           | Unclear            | Low risk   | Low risk           | Low risk    | Unclear                | Low risk   | Low risk           |
| Mertens S et al.       | Unclear            | Low risk   | Low risk           | Low risk    | Unclear                | Low risk   | Low risk           |
| Vinayahalingam et al.  | High risk          | Unclear    | High risk          | Unclear     | High risk              | Unclear    | Unclear            |
| Lee et al.             | High risk          | Low risk   | High risk          | Unclear     | High risk              | High risk  | High risk          |
| Hur et al.             | Low risk           | High risk  | High risk          | Unclear     | High risk              | Low risk   | Low risk           |
| De Araujo Faria et al. | Low risk           | Low risk   | Low risk           | Low risk    | Low risk               | Low risk   | Low risk           |
| Mao et al.             | Unclear            | Low risk   | Unclear            | Unclear     | Unclear                | Low risk   | Low risk           |
| Bayraktar et al.       | Low risk           | Low risk   | Low risk           | Low risk    | Low risk               | Low risk   | Low risk           |
| Zhu et al.             | Low risk           | Low risk   | Low risk           | Low risk    | Low risk               | Low risk   | Unclear            |
| Łukasz Zadrozny et al. | Low risk           | Low risk   | Low risk           | Low risk    | High risk              | Low risk   | High risk          |
| Shihao Li et al.       | Low risk           | Low risk   | Low risk           | High risk   | Low risk               | Low risk   | Low risk           |
